# Supplementary figures and images for: Conditional cash transfer schemes in Nigeria: potential gains for maternal and child health service uptake in a national pilot programme
Source: Springer Nature journal article supplement (doi:10.1186/s12884-014-0408-9), 2014-12-01

**Total number of newborns provided with OPV at birth (by month, per 100,000 catchment population)**

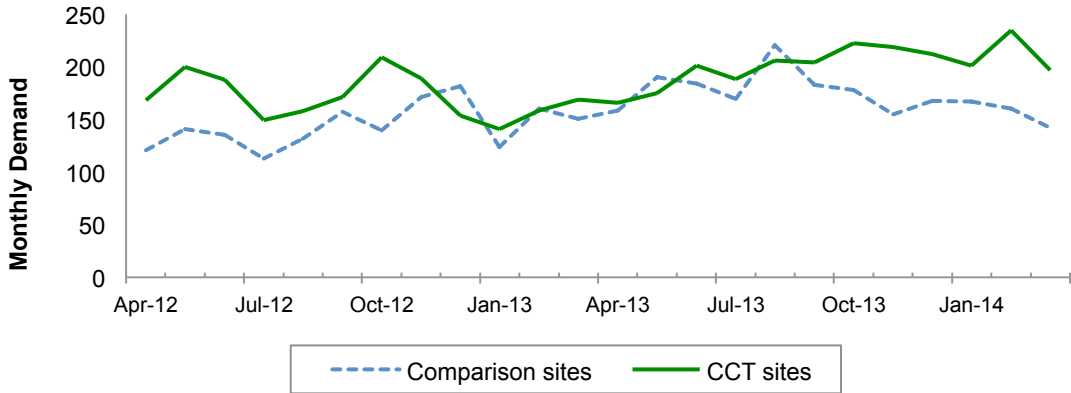

Supplement: MOESM7 [file 9742906]
